# Supplementary material for: Comprehensive Modelling of the Neurospora Circadian Clock and Its Temperature Compensation
Source: PLoS Comput Biol. 2012 Mar 29;8(3):e1002437. doi: 10.1371/journal.pcbi.1002437 (PMC3320131; doi:10.1371/journal.pcbi.1002437)
Supplement: Table S1 — Kinetic equations used in the model. The rate of reaction i is noted v_i. (DOC) [file pcbi.1002437.s004.doc]

**Table S1: Kinetic equations used in the model**

The rate of reaction *i* is noted *v_i.*

*v_1*=

*v_2*=

*v_3*=

*v_4*=

*v_5*=

*v_6*=

*v_7*=

*v_8*=

*v_9*=

*v_10*=

*v_11*=

*v_12*=

*v_13*=

*v_14*=

*v_15*=

*v_16*=

*v_17*=

*v_18*=

*v_19*=

*v_20*=

*v_21*=

*v_22*=

*v_23*=

*v_24*=

*v_25*=

*v_26*=

*v_27*=

*v_28*=

*v_29*=

*v_30*=

*v_31*=

*v_32*=

*v_33*=

*v_34*=

*v_35*=

*v_36*=

*v_37*=

*v_38*=

*v_39*=
